# Supplementary material for: p53 suppresses MHC class II presentation by intestinal epithelium to protect against radiation-induced gastrointestinal syndrome
Source: Springer Nature journal article supplement (doi:10.1038/s41467-023-44390-w), 2024-01-02
Supplement: MOESM1 [file 41467_2023_44390_MOESM1_ESM.pdf]

Supplementary Figures and Tables

Supplementary Figure 1

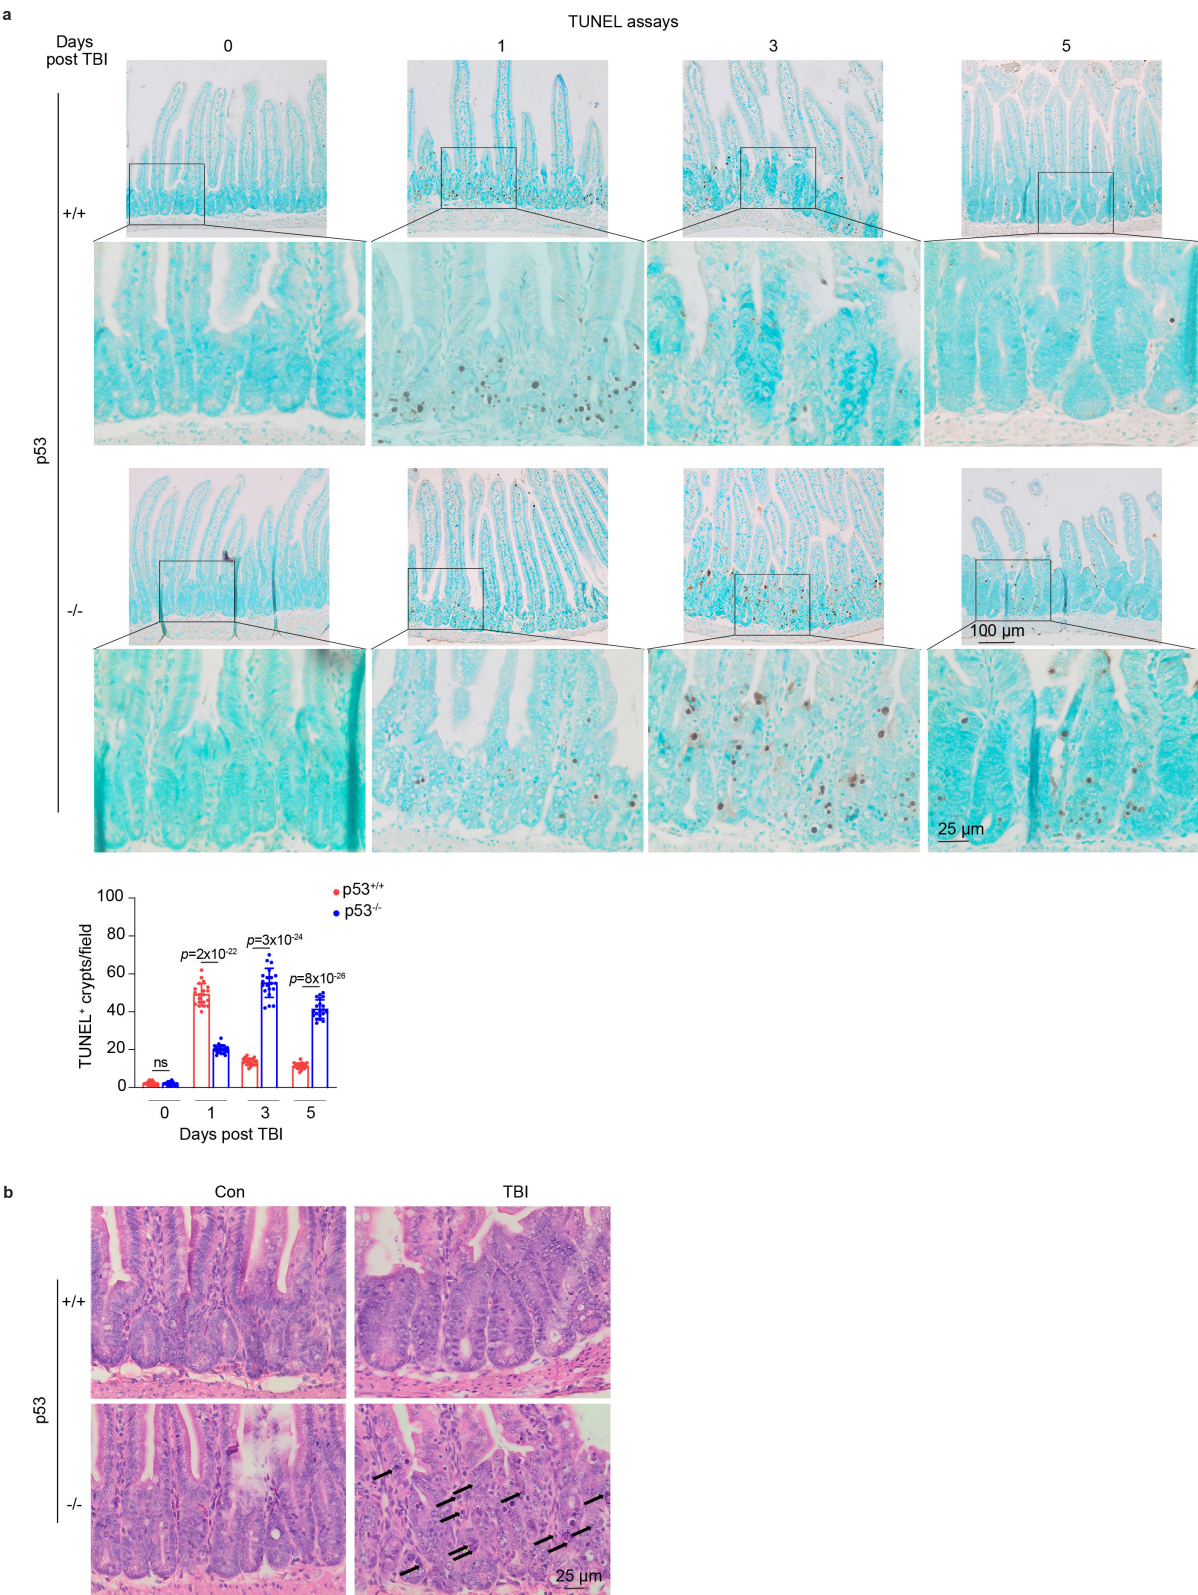

**Figure S1. p53 deficiency results in severe cell death in the SI of mice post-TBI.**

**a.** Representative images from at least 3 independent mice (upper panels) and quantification (bottom panel) of TUNEL assays in the SI of p53<sup>+/+</sup> and p53<sup>-/-</sup> mice at different time points post 12 Gy TBI.  $n = 20$  fields from at least 3 mice/group. **b.** Representative images from at least 3 independent mice showing mitotic catastrophe in the SI of p53<sup>+/+</sup> and p53<sup>-/-</sup> mice at 3 days post 12 Gy TBI. Data are presented as mean  $\pm$  SD from at least 3 independent experiments. ns: not significant, two-tailed Student's *t*-test. Source data are provided as a Source Data file.

Supplementary Figure 2

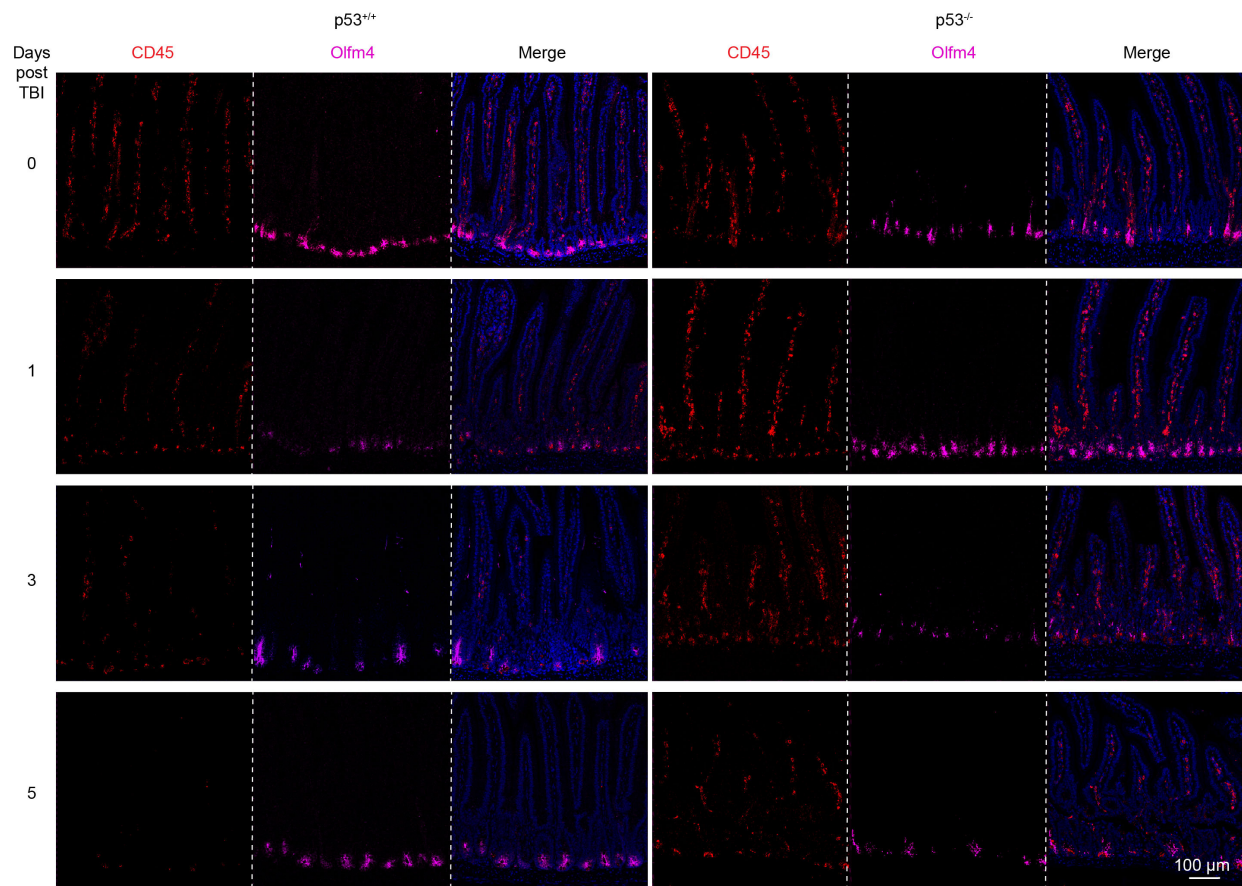

**Figure S2. p53 deficiency enhances the inflammatory immune response and ISC damage in the SI of mice post-TBI.**

Representative images from at least 3 independent mice showing IF staining of CD45 and Olfm4 in the SI of  $p53^{+/+}$  and  $p53^{-/-}$  mice at different days post 12 Gy TBI.

Supplementary Figure 3

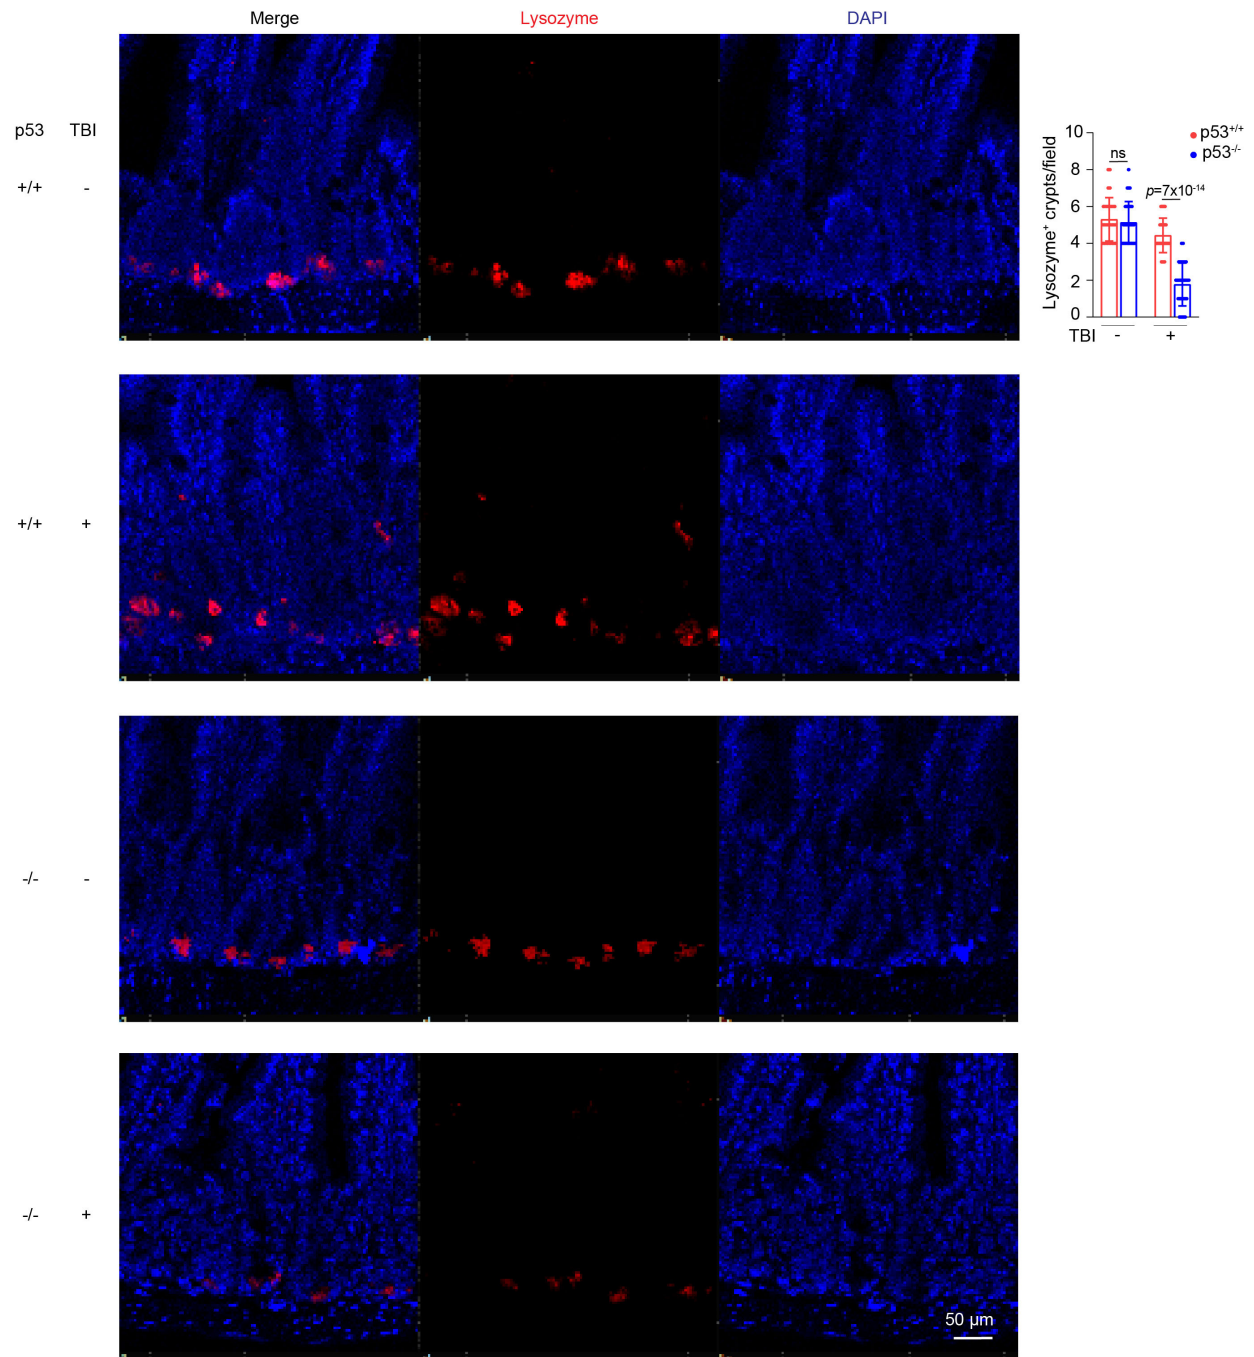

**Figure S3. p53 deficiency enhances the damage of Paneth cells in the SI of mice post-TBI.** Representative images from at least 3 independent mice (left panels) and quantification (right panel) of IF staining for lysozyme, a Paneth cell marker, in the SI of p53<sup>+/+</sup> and p53<sup>-/-</sup> mice at 3 days post-TBI. n = 30 crypts from at least 3 mice/group. Data are presented as mean ± SD from

at least 3 independent experiments. ns: not significant, two-tailed Student's *t*-test. Source data are provided as a Source Data file.

Supplementary Figure 4

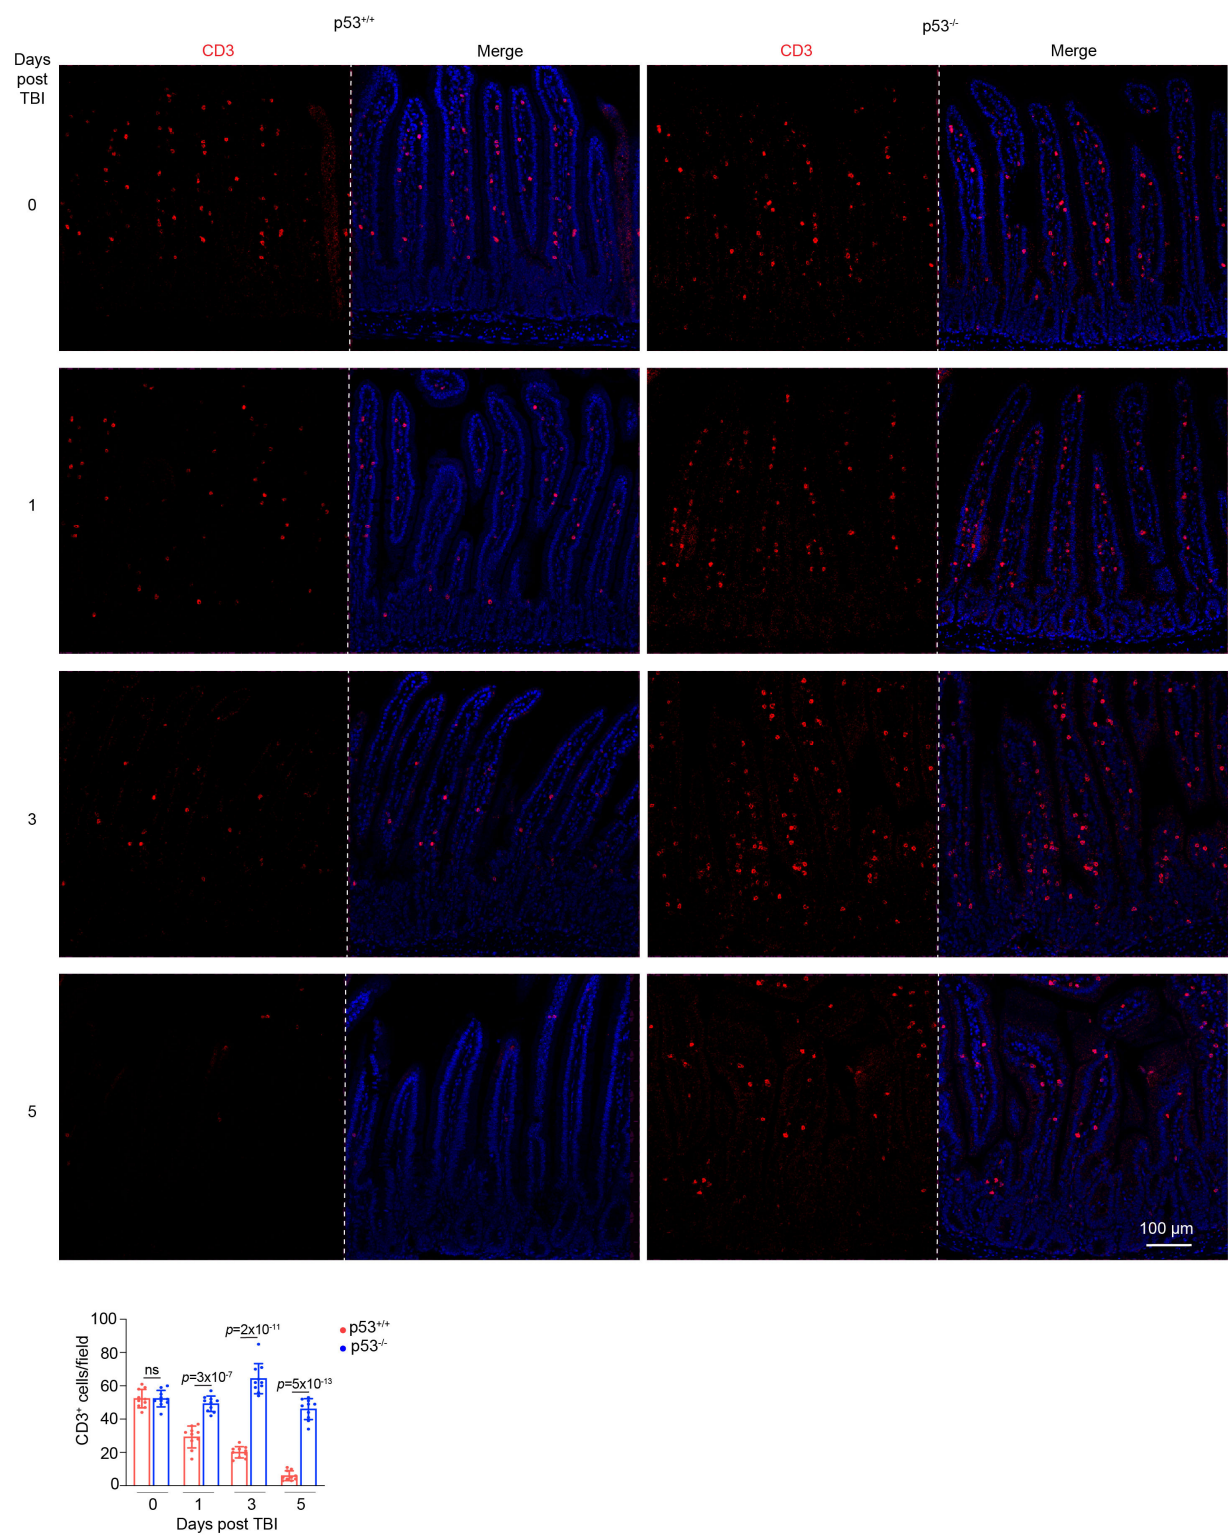

Figure S4. p53 deficiency enhances the number of CD3<sup>+</sup> T cells in the SI of mice post-TBI.

Representative images from at least 3 independent mice (upper panels) and quantification (bottom panel) of IF staining of CD3 in the SI of p53<sup>+/+</sup> and p53<sup>-/-</sup> mice at different days post-TBI. n = 10 fields from at least 3 mice/group. Data are presented as mean  $\pm$  SD from at least 3 independent experiments. ns: not significant, two-tailed Student's *t*-test. Source data are provided as a Source Data file.

Supplementary Figure 5

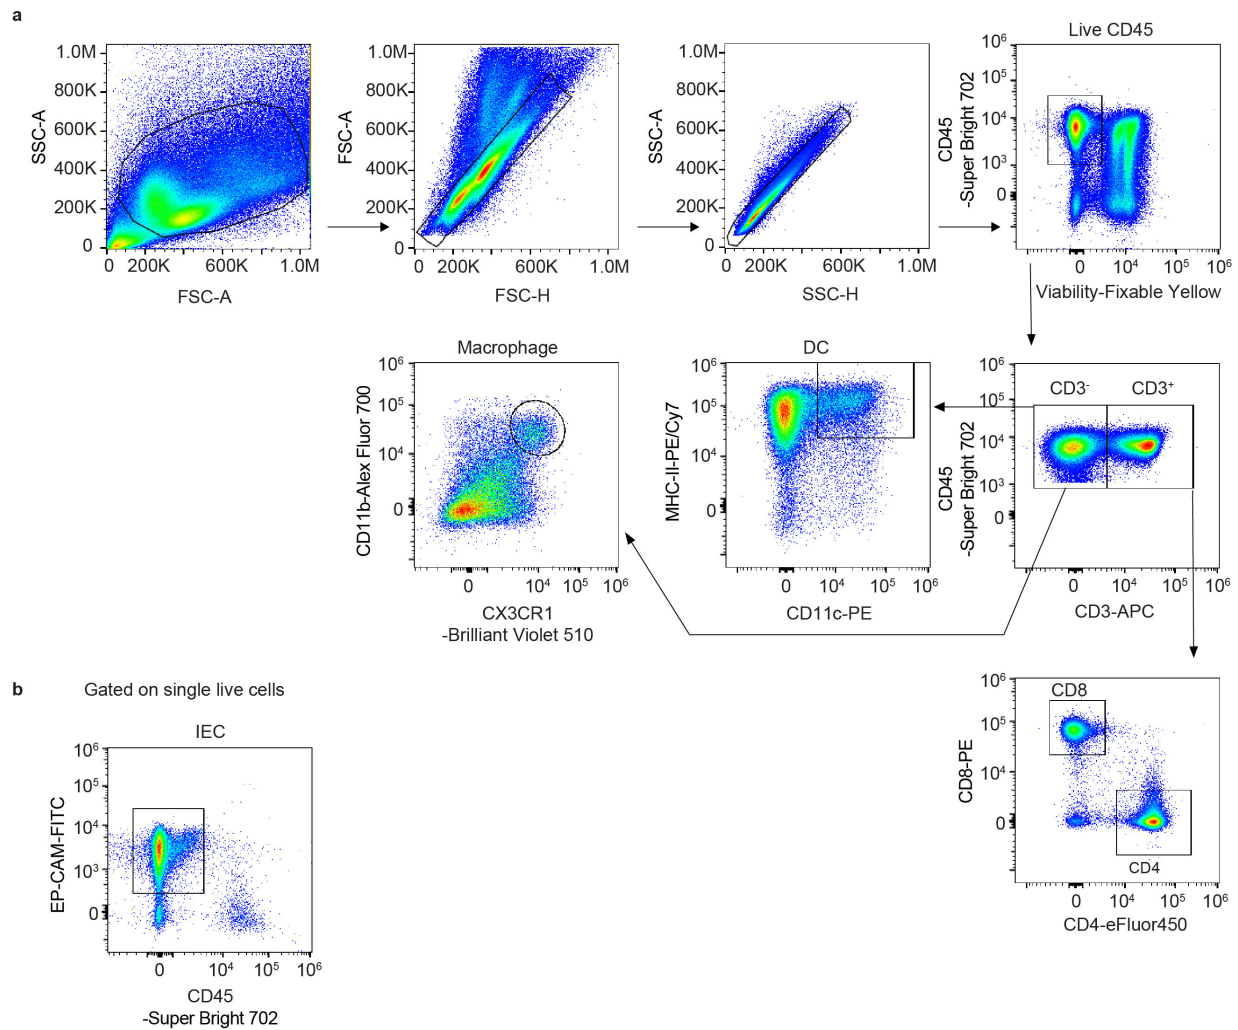

**Figure S5. Gating strategies for different immune cell populations and IEC population.**

**a.** Gating strategies for macrophages ( $CD45^+CD3^-CX3CR1^+CD11b^+$ ), DCs ( $CD45^+CD3^-MHC-II^+CD11c^+$ ),  $CD8^+$  T cells ( $CD45^+CD3^+CD8^+$ ), and  $CD4^+$  T cells ( $CD45^+CD3^+CD4^+$ ). **b.** Gating strategies for IECs ( $CD45^+EpCAM^+$ ).

Supplementary Figure 6

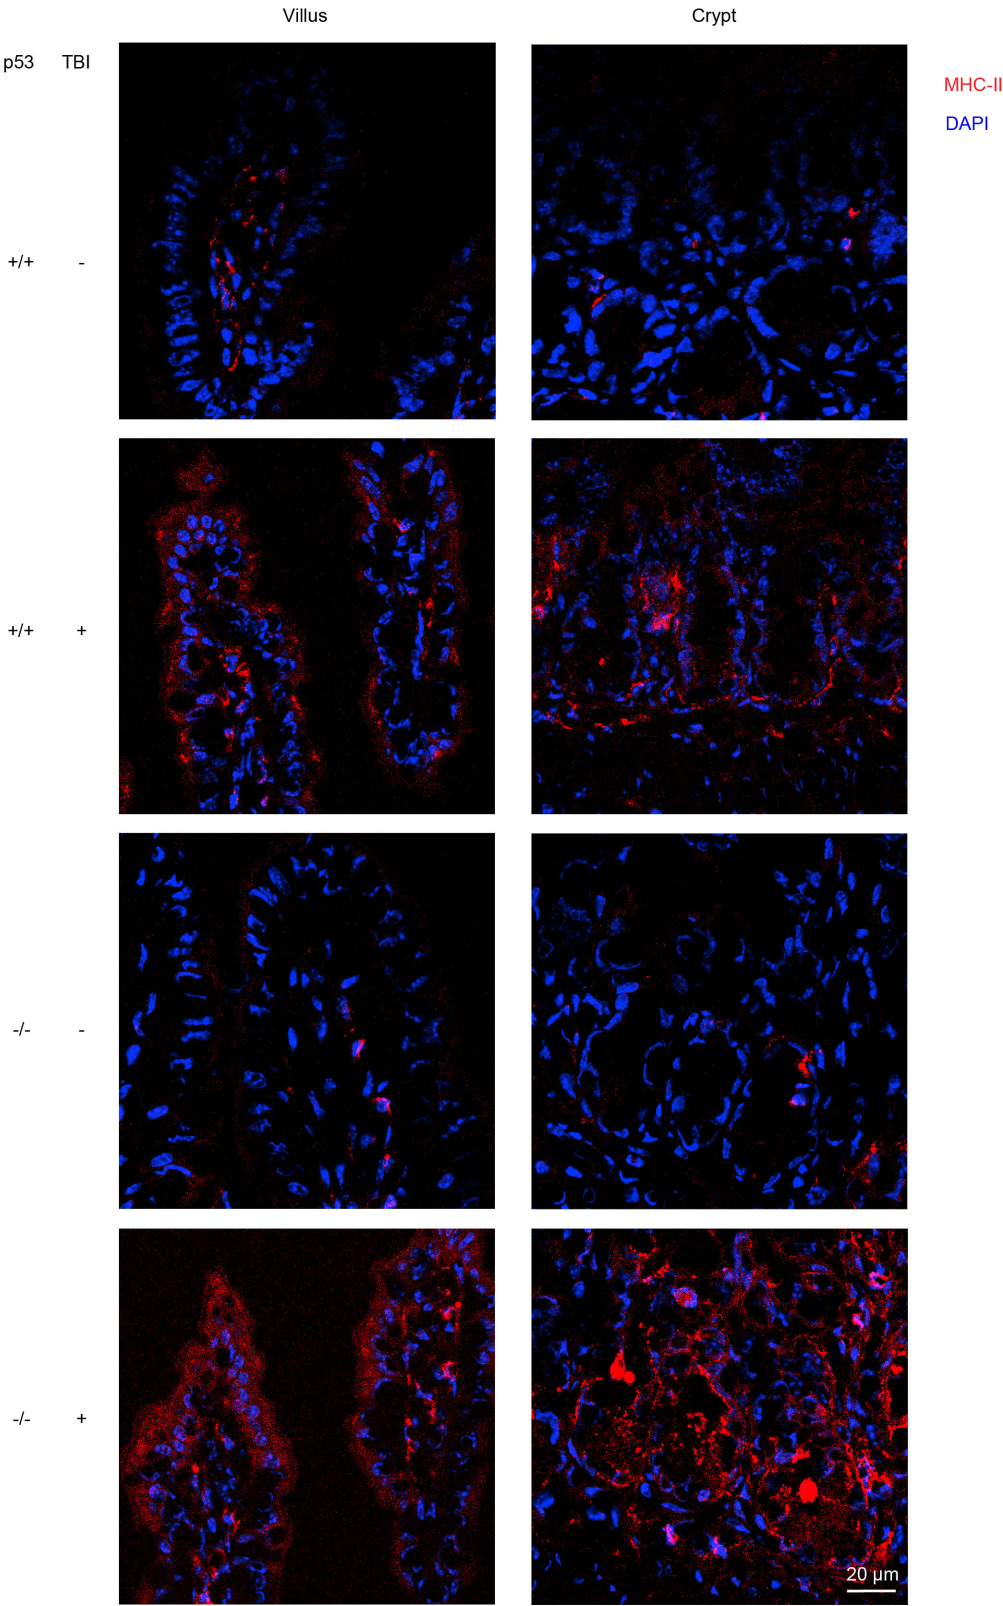

**Figure S6. p53 deficiency induces MHC-II expression on both villus and crypt cells in the SI of mice post-TBI.**

Representative images from at least 3 independent mice showing IF staining of MHC-II in the SI of p53<sup>+/+</sup> and p53<sup>-/-</sup> mice at 3 days post-TBI.

Supplementary Figure 7

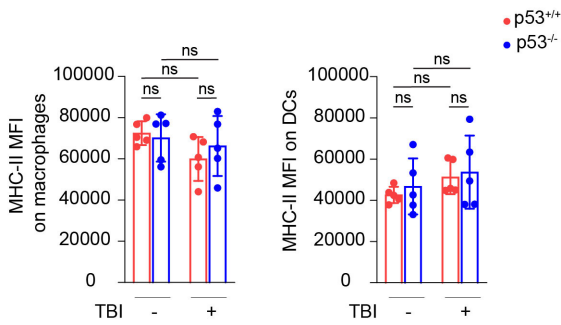

**Figure S7. p53 deficiency has no obvious effect on MHC-II expression on macrophages and DCs in the LP of mice post-TBI.**

Quantifications of MFI of MHC-II on macrophages (left panel) and DCs (right panel) in the LP of mice at 3 days post-TBI as determined by flow cytometric assays.  $n = 5$  mice/group. Data are presented as mean  $\pm$  SD from at least 3 independent experiments. ns: not significant, two-tailed Student's  $t$ -test followed by Bonferroni correction. Source data are provided as a Source Data file.

Supplementary Figure 8

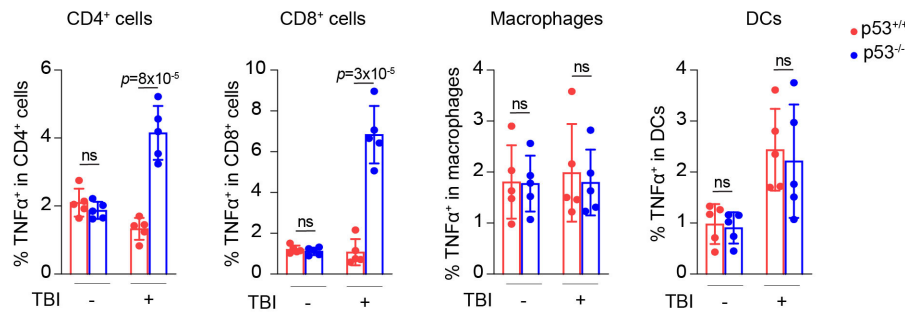

**Figure S8. p53 deficiency promotes TNFα secretion from T cells in the LP of mice post-TBI.**

Quantification of TNFα secretion from CD4<sup>+</sup>, CD8<sup>+</sup>, macrophages and DCs in the LP of mice at 3 days post-TBI as determined by flow cytometric assays. LP cells isolated from mice were stimulated with eBioscience™ Cell Stimulation Cocktail containing PMA, ionomycin, brefeldin A and monensin for 6 hours at 37°C. After cell surface staining, cells were fixed and permeabilized, followed by intracellular staining of TNFα. n = 5 mice/group. Data are presented as mean ± SD from at least 3 independent experiments. ns: not significant, two-tailed Student's *t*-test. Source data are provided as a Source Data file.

**Supplementary Figure 9**

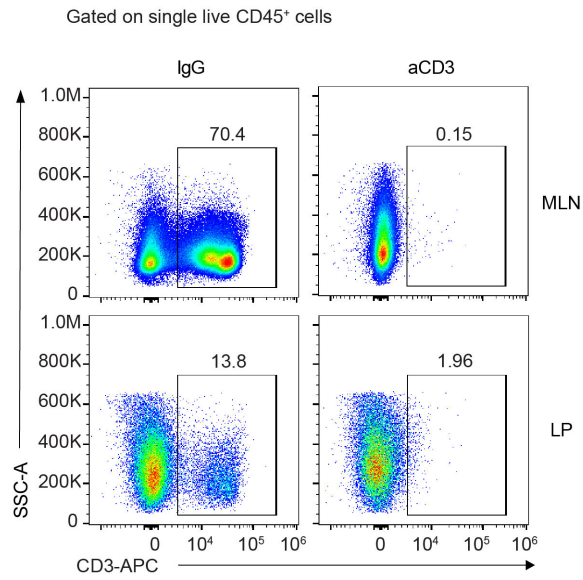

**Figure S9. The depletion of CD3<sup>+</sup> T cells in mice upon the aCD3 antibody administration.**

Representative flow cytometric images from at least 3 independent mice showing the depletion of CD3<sup>+</sup> T cells in the MLN and LP of p53<sup>+/+</sup> mice at 6 days upon IgG or the aCD3 antibody (200 µg/mouse, once) treatment.

Supplementary Figure 10

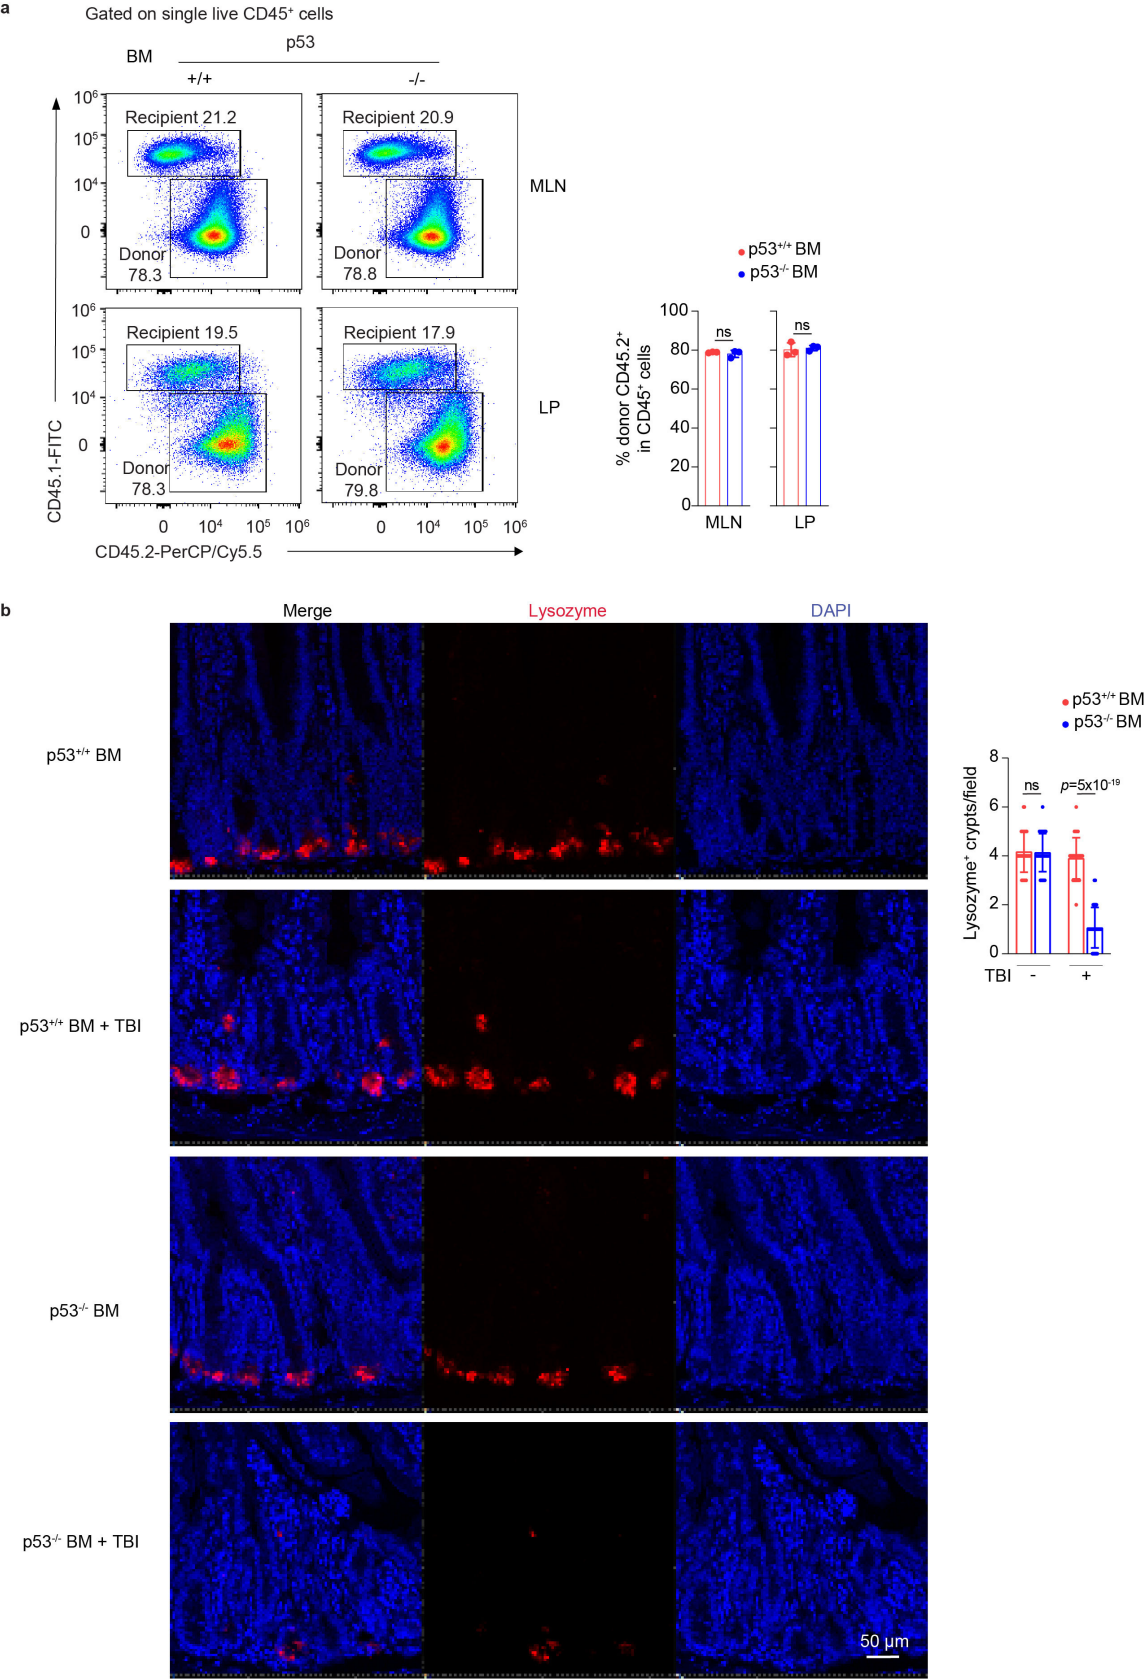

**Figure S10. Adoptive transfer of the BM derived from p53<sup>-/-</sup> mice into p53<sup>+/+</sup> mice exacerbates the damage of Paneth cells post-TBI.**

**a.** CD45.1<sup>+</sup> mice were adoptively transferred with BM cells isolated from CD45.2<sup>+</sup> p53<sup>+/+</sup> and p53<sup>-/-</sup> mice. The reconstitution of donor CD45.2<sup>+</sup> CD45<sup>+</sup> immune cells in the MLN and LP was examined at 28 days after adoptive transfer by flow cytometric assays. *n* = 3 mice/group. **b.** Representative images from at least 3 independent mice (left panels) and quantification (right panel) of IF staining of the lysozyme in the SI of mice at 5 days post 12 Gy TBI. *n* = 30 crypts from at least 3 mice/group. Data are presented as mean ± SD from at least 3 independent experiments. ns: not significant, two-tailed Student's *t*-test. Source data are provided as a Source Data file.

Supplementary Figure 11

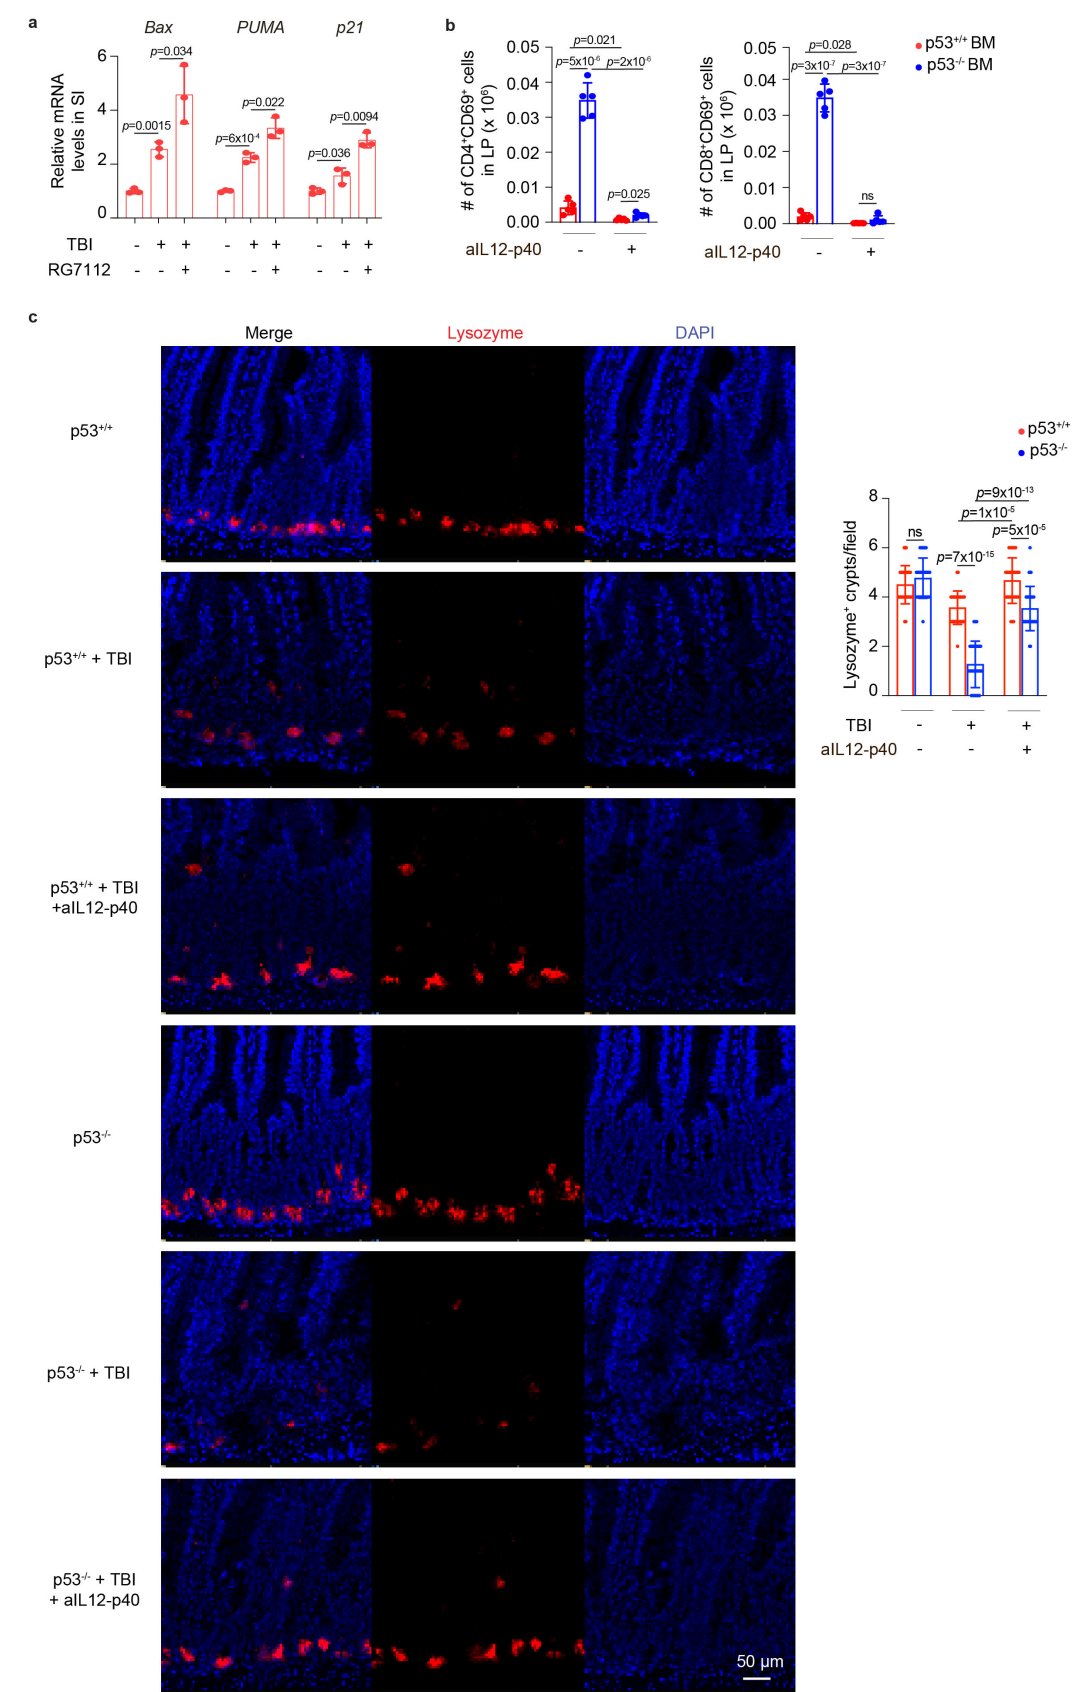

**Figure S11. aIL12-p40 antibody reduces the damage of Paneth cells in the SI of mice post-TBI.**

**a.** The mRNA levels of *BAX*, *PUMA* and *p21* in the SI of p53<sup>+/+</sup> mice at 6 hours post 12 Gy TBI along with or without RG7112 treatment (*i.p.*, 50 µg/g body weight, twice, 8 hours before and 1 hour post-TBI) determined by qPCR assays. n = 3 mice/group. **b.** The number of CD69<sup>+</sup> activated CD4<sup>+</sup> (left panel) and CD8<sup>+</sup> (right panel) T cells in the LP of mice at 3 days post-TBI determined by flow cytometric assays. n = 5 mice/group. **c.** Representative images from at least 3 independent mice (left panels) and quantification (right panel) of IF staining of lysozyme in the SI of mice at 3 days post-TBI. n = 30 crypts from at least 3 mice/group. Data are presented as mean ± SD from at least 3 independent experiments. ns: not significant, two-tailed Student's *t*-test followed by Bonferroni correction. Source data are provided as a Source Data file.

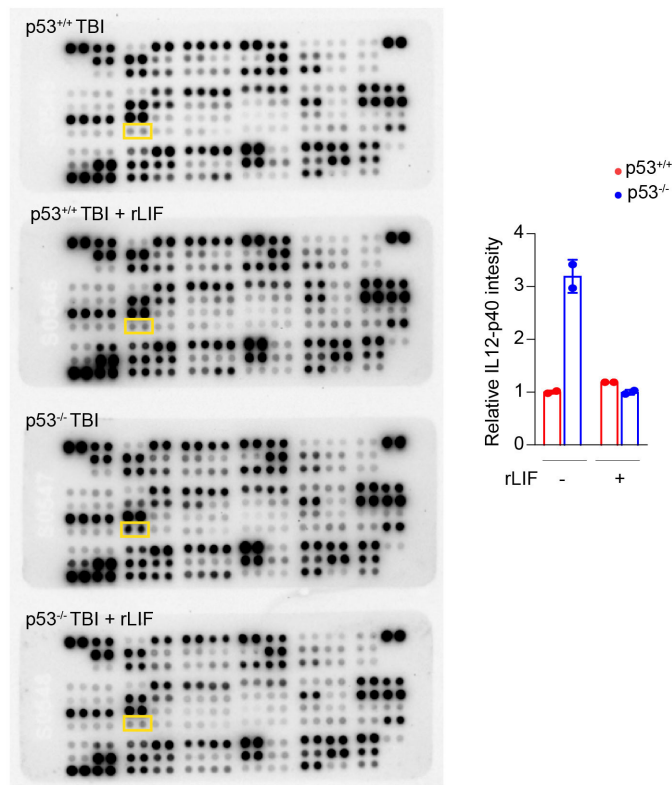

**Figure S12. rLIF administration inhibits the IL12-p40 production in  $p53^{-/-}$  mice post-TBI.**

Left: representative images of cytokine levels in the serum from  $p53^{+/+}$  and  $p53^{-/-}$  mice with or without rLIF administration at 3 days post 12 Gy TBI detected by using the Proteome Profiler Mouse XL Cytokine Array. Right: quantification of IL12-p40 levels in Cytokine Array. Each array represents a pool of 3 mice with the same treatment. Dots in yellow box represent IL12-p40. Source data are provided as a Source Data file.

Supplementary Figure 13

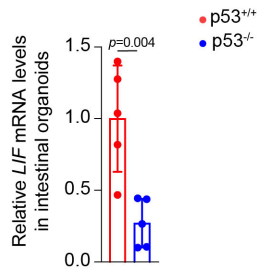

**Figure S13. *p53* deficiency reduces *LIF* expression levels in intestinal organoids.**

The mRNA levels of *LIF* in intestinal organoids derived from *p53*<sup>+/+</sup> and *p53*<sup>-/-</sup> mice determined by qPCR assays.  $n = 5/\text{group}$ . Data are presented as mean  $\pm$  SD from at least 3 independent experiments. Two-tailed Student's *t*-test. Source data are provided as a Source Data file.

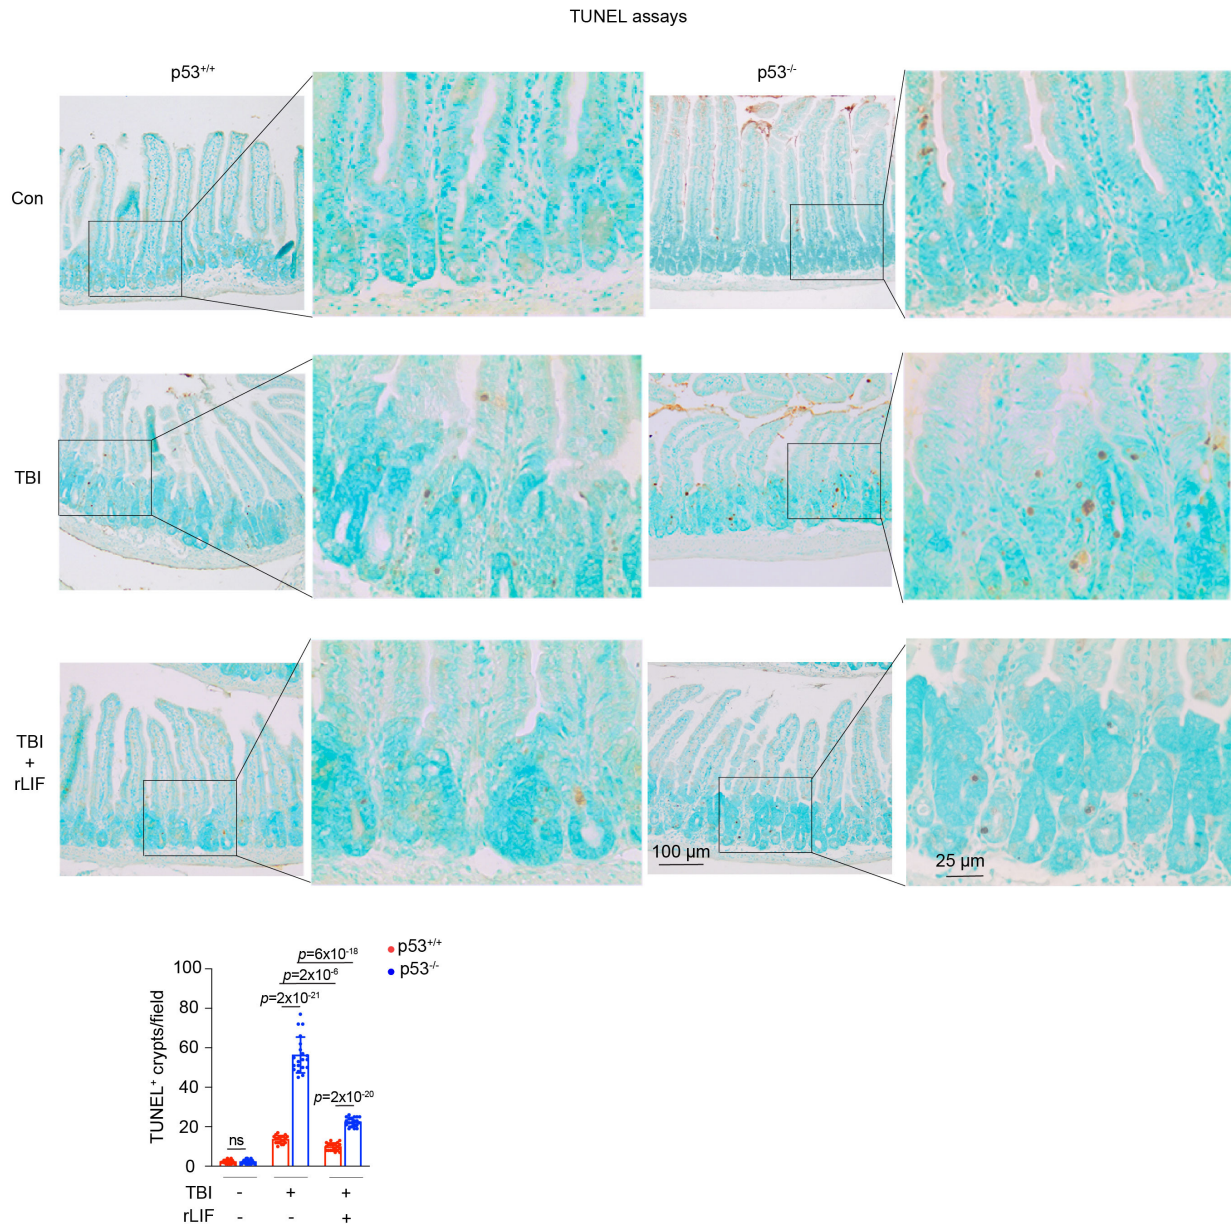

**Figure S14. rLIF administration reduces cell death in the SI in  $p53^{-/-}$  mice post-TBI.**

Representative images from at least 3 independent mice (upper panels) and quantification (bottom panel) of TUNEL assays in the SI of  $p53^{+/+}$  and  $p53^{-/-}$  mice with or without rLIF administration at 3 days post 12 Gy TBI.  $n = 20$  fields from at least 3 mice/group. Data are presented as mean  $\pm$  SD from at least 3 independent experiments. ns: not significant, two-tailed Student's  $t$ -test followed by Bonferroni correction. Source data are provided as a Source Data file.

Supplementary Figure 15

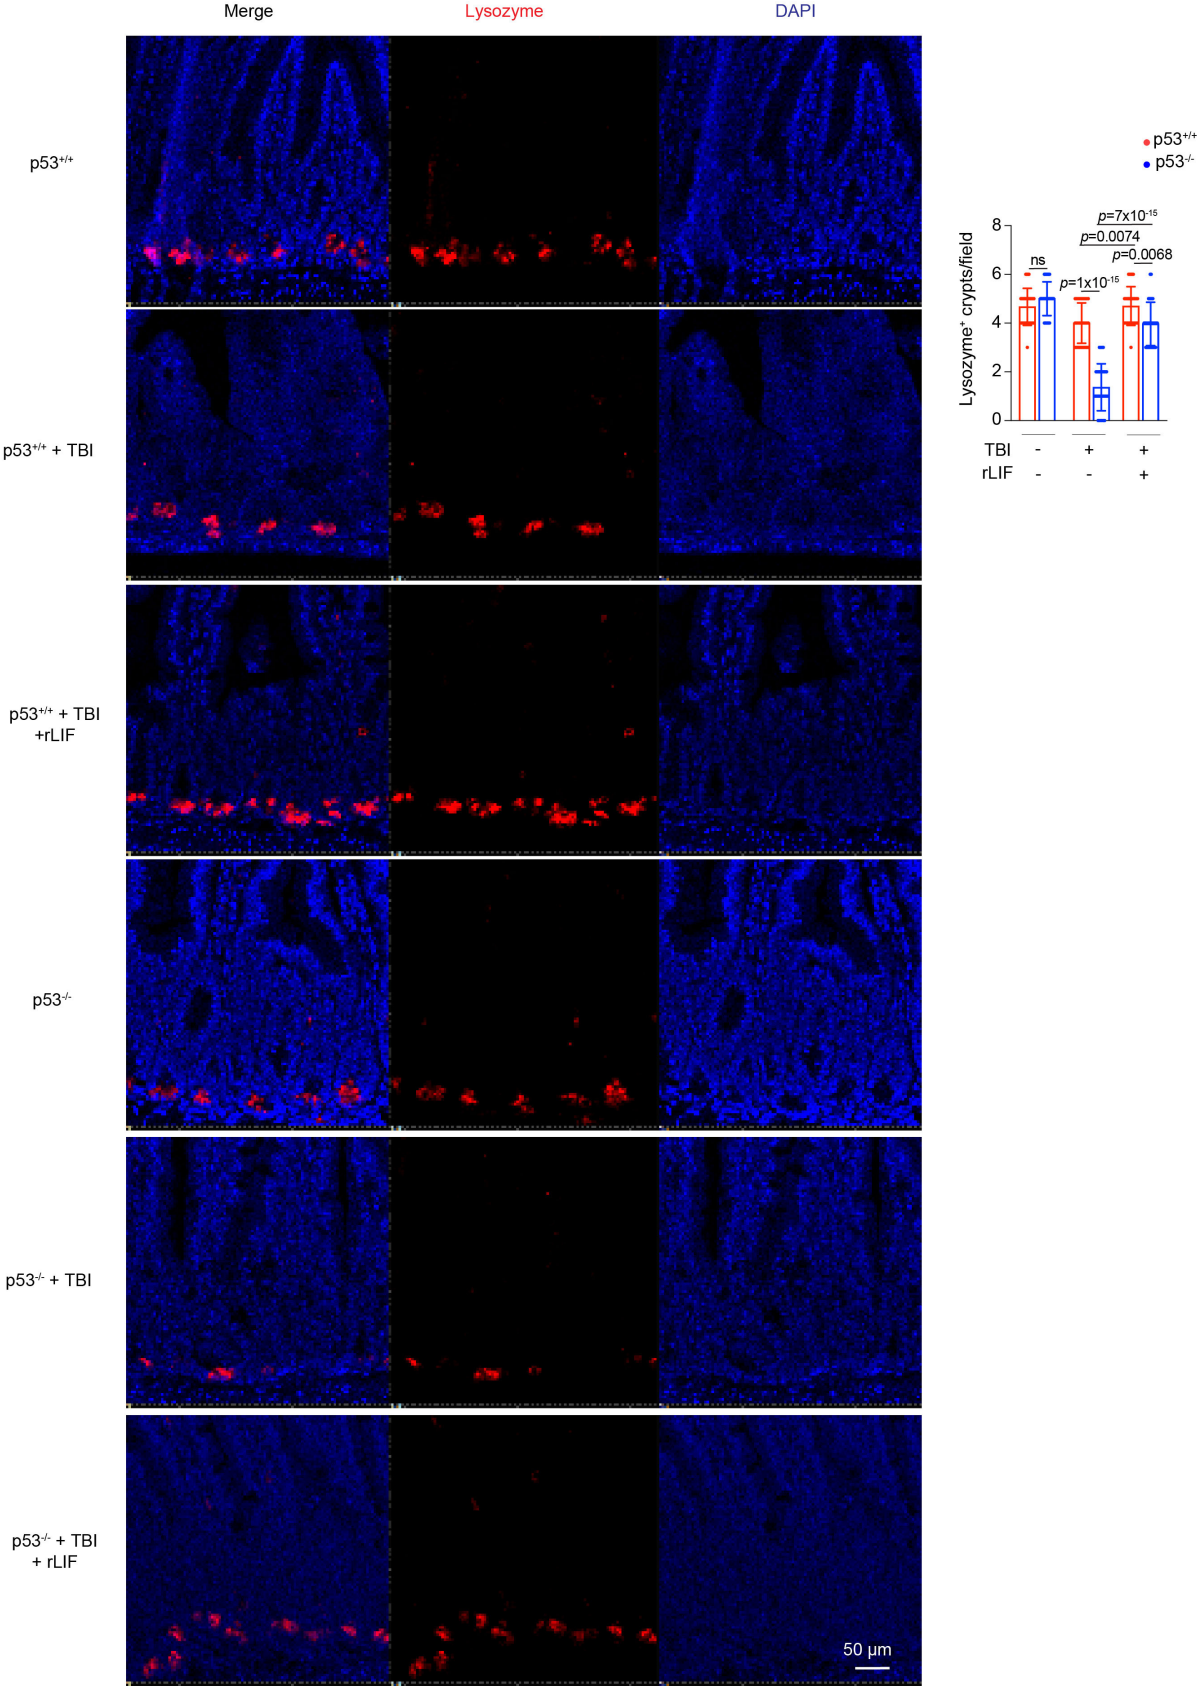

**Figure S15. rLIF administration reduces the damage of Paneth cells in p53<sup>-/-</sup> mice post-TBI.** Representative images from at least 3 independent mice (left panels) and quantification (right panel) of IF staining of lysozyme in the SI of mice at 3 days post-TBI. n = 30 crypts from at least 3 mice/group. Data are presented as mean  $\pm$  SD from at least 3 independent experiments. ns: not significant, two-tailed Student's *t*-test followed by Bonferroni correction. Source data are provided as a Source Data file.

**Supplementary Table S1. Information of flow antibodies used in this study**

| <b>Flow antibodies and reagents</b>                        |                   |            |             |
|------------------------------------------------------------|-------------------|------------|-------------|
| REAGENT or RESOURCE                                        | SOURCE            | Cata#      | CLONE       |
| eFluor450 anti-mouse CD4                                   | eBioscience       | 48-0042-82 | RM4-5       |
| Brilliant Violet 510™ anti-mouse CX3CR1                    | Biolegend         | 149025     | SA011F11    |
| Super Bright 702 anti-mouse CD45                           | Thermo Fisher     | 67-0451-82 | 30-F11      |
| FITC anti-mouse Ep-CAM                                     | Biolegend         | 118208     | G8.8        |
| FITC anti-mouse CD45.1                                     | Biolegend         | 110706     | A20         |
| Per/Cy5.5 anti-mouse CD45.2                                | Biolegend         | 109828     | 104         |
| PE anti-mouse CD11c                                        | Biolegend         | 117308     | N418        |
| PE anti-mouse CD8                                          | Biolegend         | 100708     | 53-6.7      |
| PE/Cy7 anti-mouse MHC-II                                   | Biolegend         | 107630     | M5/114.15.2 |
| APC anti-mouse CD3                                         | Biolegend         | 100236     | 17A2        |
| PE/Cy7 anti-mouse CD25                                     | BD                | 552880     | PC61        |
| Alex Fluor 700 anti-mouse CD69                             | Biolegend         | 104539     | H1.2F3      |
| Alex Fluor 700 anti-mouse CD11b                            | Biolegend         | 101222     | M1/70       |
| Alex Fluor 700 anti-mouse TNF $\alpha$                     | Biolegend         | 506338     | MP6-XT22    |
| Cell Stimulation Cocktail                                  | Thermo Scientific | 00-4975-03 | N/A         |
| BD cytofix/cytoperm Fixation/Permeabilization Solution Kit | BD                | 554714     | N/A         |
| Ultra-LEAF™ Purified anti-mouse CD16/32                    | Biolegend         | 101339     | 93          |
| LIVE/DEAD™ Fixable Yellow Dead Cell Stain Kit              | Thermo Fisher     | L34968     | N/A         |
| Abc Total Antibody Compensation Bead Kit                   | Thermo Fisher     | A10497     | N/A         |

**Supplementary Table S2. Sequences of qPCR primers**

| <b>Gene</b>    | <b>Forward Primer</b>                | <b>Reverse Primer</b>          |
|----------------|--------------------------------------|--------------------------------|
| $\beta$ -actin | 5' GAACCCTAAGGCCAACCGTGAAAAGATGAC 3' | 5' GCAGGATGGCGTGAGGGAGAGCA 3'  |
| TNF $\alpha$   | 5' CTGAACTTCGGGGTGATCGG 3'           | 5' GGCTTGTCACCTCGAATTTTGAGA 3' |
| BAX            | 5' TGAAGACAGGGGCCTTTTGTG 3'          | 5' AATTCGCCGGAGACACTCG 3'      |
| PUMA           | 5' GTCGCTACCGTCGTGACTTC 3'           | 5' CAGACATGCACCTACCCAGC 3'     |
| p21            | 5' CCTGGTGATGTCCGACCTG 3'            | 5' CCATGAGCGCATCGCAATC 3'      |
